# Supplementary material for: Bcl2 inhibition of mitochondrial DNA repair
Source: PubMed Central journal article supplement (PMC4535531; doi:10.1186/s12885-015-1594-1), 2015-08-13
Supplement: 12885_2015_1594_MOESM1_ESM.pdf [file 12885_2015_1594_MOESM1_ESM.pdf]

Supplemental Data

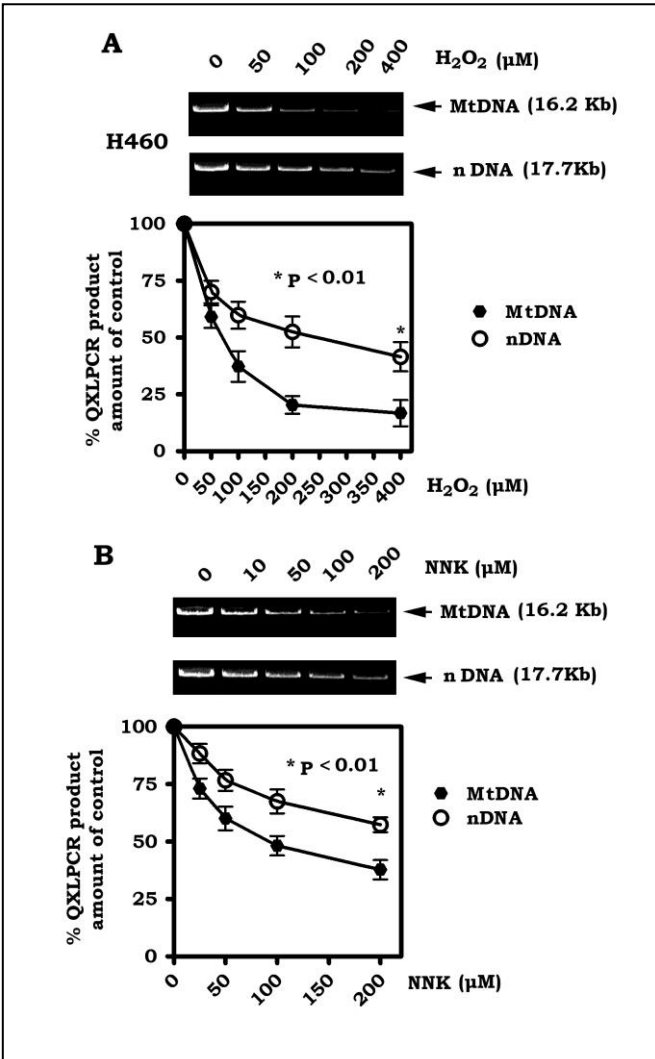

**Figure S1. Mitochondrial DNA (mtDNA) is more vulnerable than nuclear DNA (nDNA) to damage induced by H<sub>2</sub>O<sub>2</sub> or NNK in H460 cells.** H460 cells were treated with increasing concentrations of H<sub>2</sub>O<sub>2</sub> (A) or NNK (B) for 60 min. The mtDNA or nDNA damage was measured by QXLPCR and quantified by Pico Green dsDNA Quantitation kit. Quantification data are mean ± SD from three independent experiments.

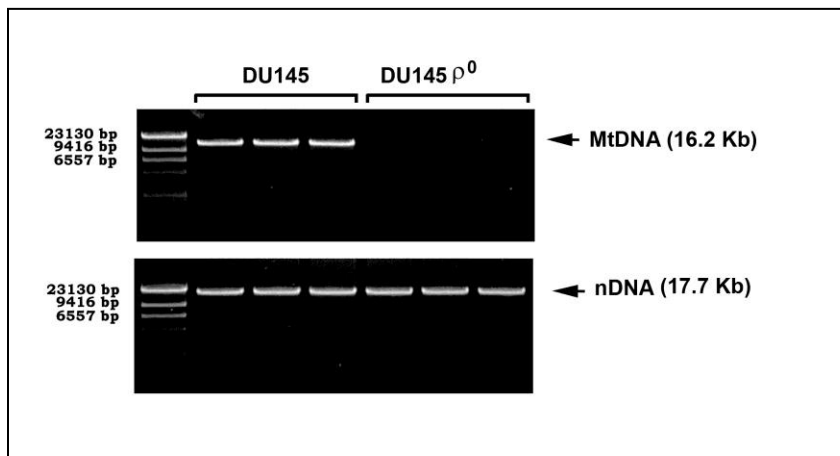

**Figure S2.** The mtDNA or nDNA was compared in DU145 cells and DU145  $\rho^0$  cells (mtDNA deficient cells) by QXLPCR using the primers for mtDNA or primers for the  $\beta$ -globin gene of nDNA, respectively, as described in “Methods”.

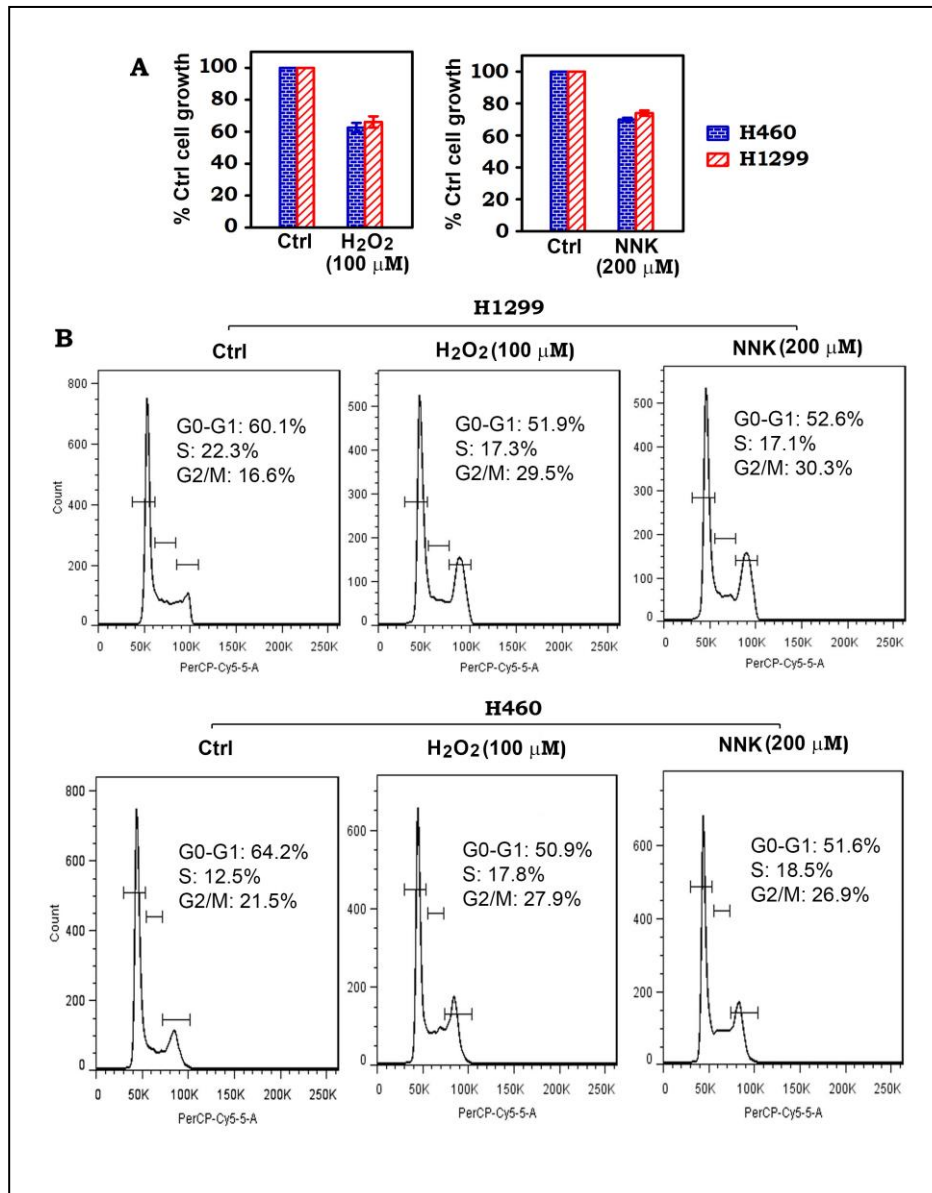

**Figure S3.** H1299 and H460 cells were treated with H<sub>2</sub>O<sub>2</sub> (100 μM) or NNK (200 μM) in serum-free medium for 60 min, followed by washing with 1×PBS. Cells were cultured in normal medium for 24h. Cell proliferation was measured using MTT kit (A). Cell cycle was also analyzed as described in “Methods” (B).

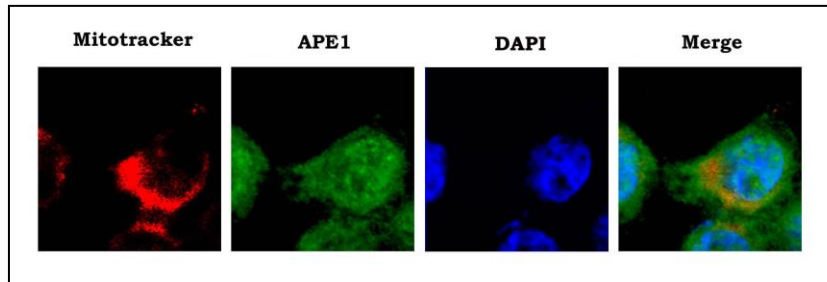

**Figure S4.** H460 cells were grown on LabTek 8-well chamber slides, then fixed with methanol and acetone (1:1) for 5 min at  $-20^{\circ}\text{C}$ . After blocking with 10% normal goat serum for 20 min at room temperature, chamber slides were incubated with rabbit APE1 primary antibody (1:500) overnight at  $4^{\circ}\text{C}$ . After washing with PBS, the cells were incubated with Alexa 488 (green)-conjugated anti-rabbit and Mito Tracker (red, Invitrogen) for 30 min. After washing, cells were stained with DAPI for 60 min at room temperature and observed under a fluorescent confocal microscope (Zeiss, Sweden).
